# Supplementary material for: Spectroscopic study of a synthesized Alq3 end-capped oligothiophene applied in organic solar cells
Source: Royal Society of Chemistry journal article supplement (doi:10.1039/c3ra47367h), 2014-01-01
Supplement: c3ra47367h.pdf [file c3ra47367h.pdf]

## SUPPORTING INFORMATION

### Spectroscopic study of a synthesized Alq<sub>3</sub> end-capped oligothiophene applied in organic solar cells

Venla M. Manninen,<sup>\*a</sup> Juha P. Heiskanen,<sup>b</sup> Kimmo M. Kaunisto,<sup>a</sup> Osmo E. O. Hormi<sup>b</sup> and Helge J. Lemmetyinen<sup>a</sup>

<sup>a</sup>Department of Chemistry and Bioengineering, Tampere University of Technology, P.O. Box 541, FI-33101, Tampere, Finland.

<sup>b</sup>Department of Chemistry, University of Oulu, P.O. Box 3000, FI-90014, Finland.

[venla.manninen@tut.fi](mailto:venla.manninen@tut.fi), [juha.heiskanen@oulu.fi](mailto:juha.heiskanen@oulu.fi), [kimmo.kaunisto@tut.fi](mailto:kimmo.kaunisto@tut.fi), [osmo.hormi@oulu.fi](mailto:osmo.hormi@oulu.fi), [helge.lemmetyinen@tut.fi](mailto:helge.lemmetyinen@tut.fi)

#### Contents:

|                                                                                                                                                                                   |              |
|-----------------------------------------------------------------------------------------------------------------------------------------------------------------------------------|--------------|
| <b><sup>1</sup>H NMR spectra of compounds 2–4</b> .....                                                                                                                           | <b>2 - 7</b> |
| <b><sup>1</sup>H NMR spectrum of compound 5</b> .....                                                                                                                             | <b>8</b>     |
| <b><sup>13</sup>C NMR spectrum of compound 5</b> .....                                                                                                                            | <b>10</b>    |
| <b><sup>1</sup>H NMR spectrum of compound 6</b> .....                                                                                                                             | <b>12</b>    |
| <b><sup>13</sup>C NMR spectrum of compound 6</b> .....                                                                                                                            | <b>14</b>    |
| <b><sup>1</sup>H NMR spectrum of (Alq<sub>3</sub>)<sub>2</sub>-OT</b><br>.....                                                                                                    | <b>16</b>    |
| <b>Quenching of compound 5, Alq<sub>3</sub> and (Alq<sub>3</sub>)<sub>2</sub>-OT in the presence of<br/>PCBM</b> .....                                                            | <b>17</b>    |
| <b>TCSPC decay curves of the (Alq<sub>3</sub>)<sub>2</sub>-OT and PCBM film samples and DAS spectra of (Alq<sub>3</sub>)<sub>2</sub>-OT and PCBM in CHCl<sub>3</sub></b><br>..... | <b>17</b>    |
| <b>Table of the solar cell results with compound 5</b> .....                                                                                                                      | <b>17</b>    |
| <b>Absorption and emission spectra of the evaporated films of (Alq<sub>3</sub>)<sub>2</sub>-OT</b><br>.....                                                                       | <b>18</b>    |
| <b>DSC curve of (Alq<sub>3</sub>)<sub>2</sub>-OT</b><br>.....                                                                                                                     | <b>18</b>    |

|                                                                                                                         |           |
|-------------------------------------------------------------------------------------------------------------------------|-----------|
| <b>Transient absorption and decay component spectra of (Alq<sub>3</sub>)<sub>2</sub>-OT mixed with PCBM.....</b>        | <b>19</b> |
| <b>Excitation spectra of compound 5 and (Alq<sub>3</sub>)<sub>2</sub>-OT.....</b>                                       | <b>19</b> |
| <b>DPV curves of compound 5 and (Alq<sub>3</sub>)<sub>2</sub>-OT and calculations of the HOMO and LUMO levels .....</b> | <b>20</b> |

### $^1\text{H}$ NMR spectrum of 5,5''-dibromo-3,3''-dihexyl-2,2':5',2'':5'',2'''-quaterthiophene(2)

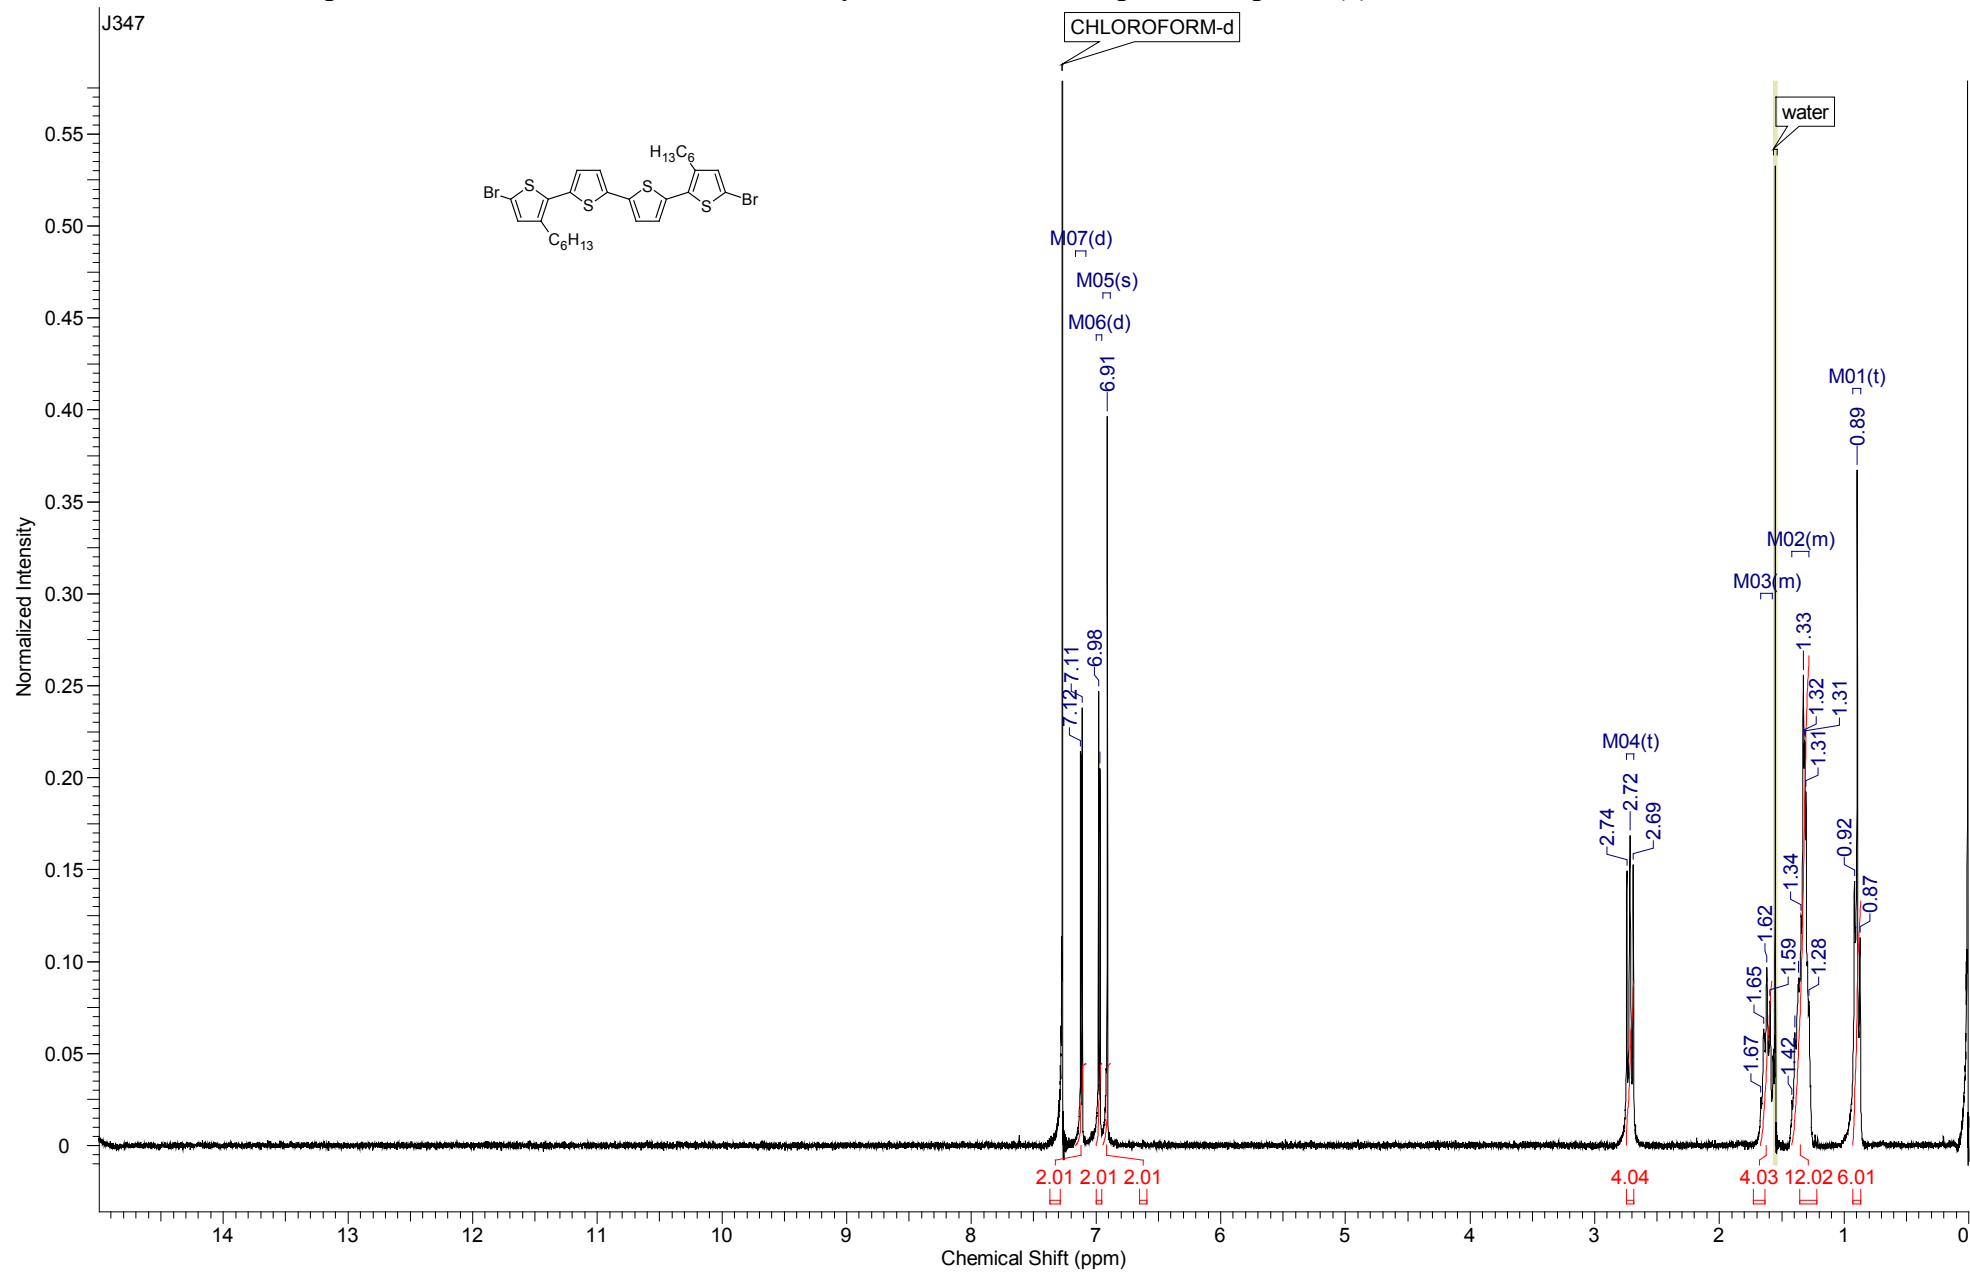

| No. | Shift1 (ppm) | H's | Type | J (Hz) | Multiplet1 | Connections | (ppm)          |
|-----|--------------|-----|------|--------|------------|-------------|----------------|
| 1   | 0.89         | 6   | t    | 6.60   | M01        | -           | [0.87 .. 0.93] |
| 2   | 1.34         | 12  | m    | -      | M02        | -           | [1.28 .. 1.42] |
| 3   | 1.63         | 4   | m    | -      | M03        | -           | [1.58 .. 1.67] |
| 4   | 2.72         | 4   | t    | 7.50   | M04        | -           | [2.69 .. 2.75] |
| 5   | 6.91         | 2   | s    | -      | M05        | -           | [6.89 .. 6.95] |
| 6   | 6.97         | 2   | d    | 3.93   | M06        | M07         | [6.96 .. 7.00] |
| 7   | 7.12         | 2   | d    | 3.93   | M07        | M06         | [7.08 .. 7.16] |

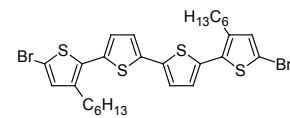

### $^1\text{H}$ NMR spectrum of 3,3''',3''',4'-tetrahexyl-2,2':5',2'':5'',2''':5''',2''':5''',2''''-sexithiophene(3)

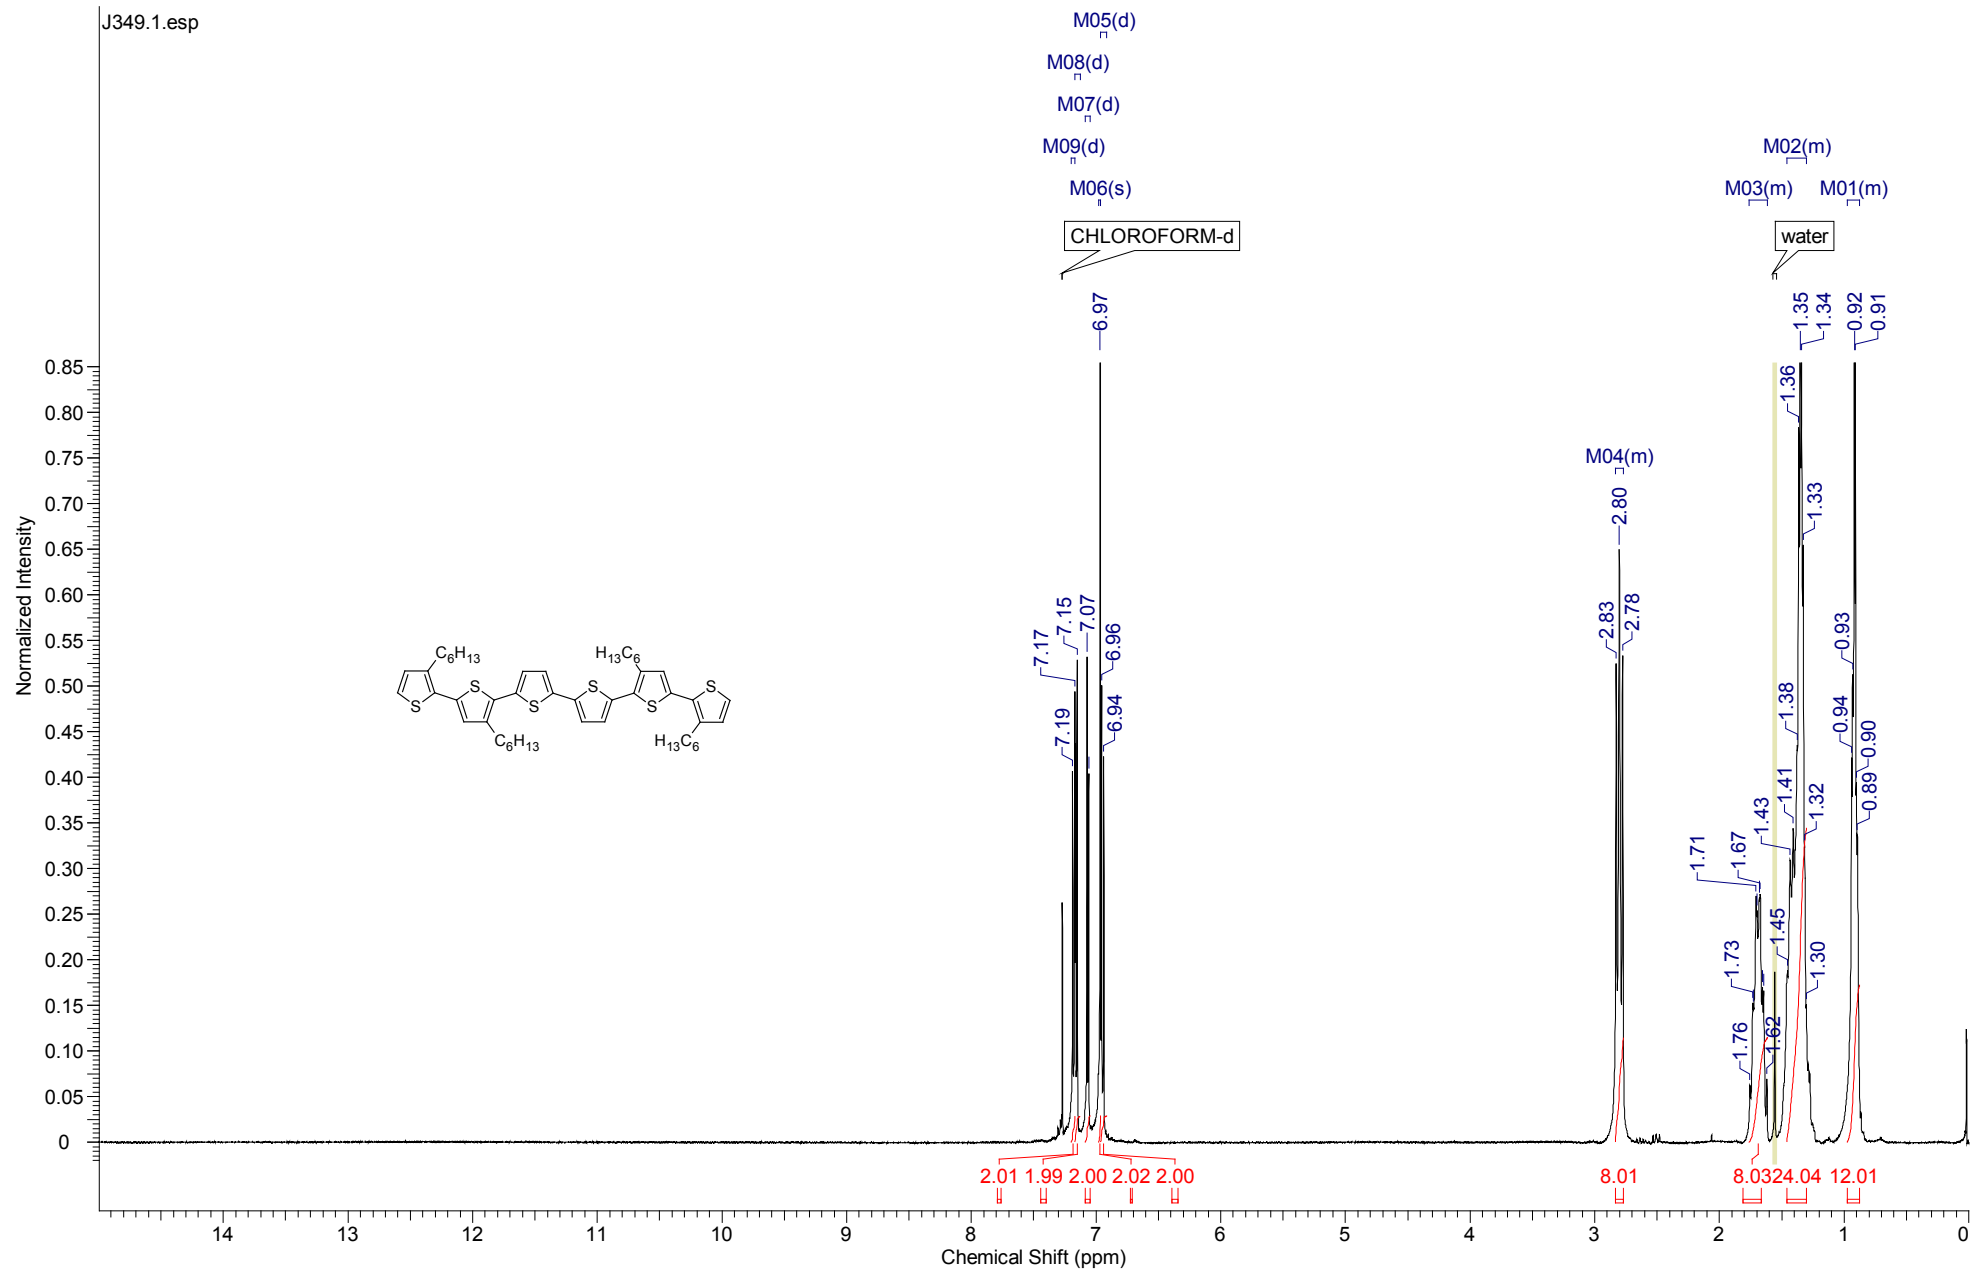

| No. | Shift1 (ppm) | H's | Type | J (Hz) | Multiplet1 | Connections | (ppm)          |
|-----|--------------|-----|------|--------|------------|-------------|----------------|
| 1   | 0.92         | 12  | m    | -      | M01        | -           | [0.88 .. 0.97] |
| 2   | 1.37         | 24  | m    | -      | M02        | -           | [1.30 .. 1.46] |
| 3   | 1.69         | 8   | m    | -      | M03        | -           | [1.61 .. 1.76] |
| 4   | 2.80         | 8   | m    | -      | M04        | -           | [2.77 .. 2.84] |
| 5   | 6.95         | 2   | d    | 5.20   | M05        | M09         | [6.92 .. 6.96] |
| 6   | 6.97         | 2   | s    | -      | M06        | -           | [6.96 .. 6.98] |
| 7   | 7.07         | 2   | d    | 3.74   | M07        | M08         | [7.05 .. 7.09] |
| 8   | 7.16         | 2   | d    | 3.74   | M08        | M07         | [7.13 .. 7.17] |
| 9   | 7.18         | 2   | d    | 5.20   | M09        | M05         | [7.17 .. 7.20] |

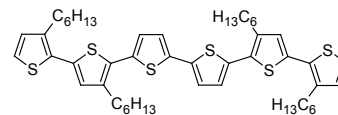

# <sup>1</sup>H NMR spectrum of 5,5''''-dibromo-3,3''''',3''''',4'-tetrahexyl-2,2':5',2'':5'',2''':5''',2''''':5''''',2''''''-sexithiophene(4)

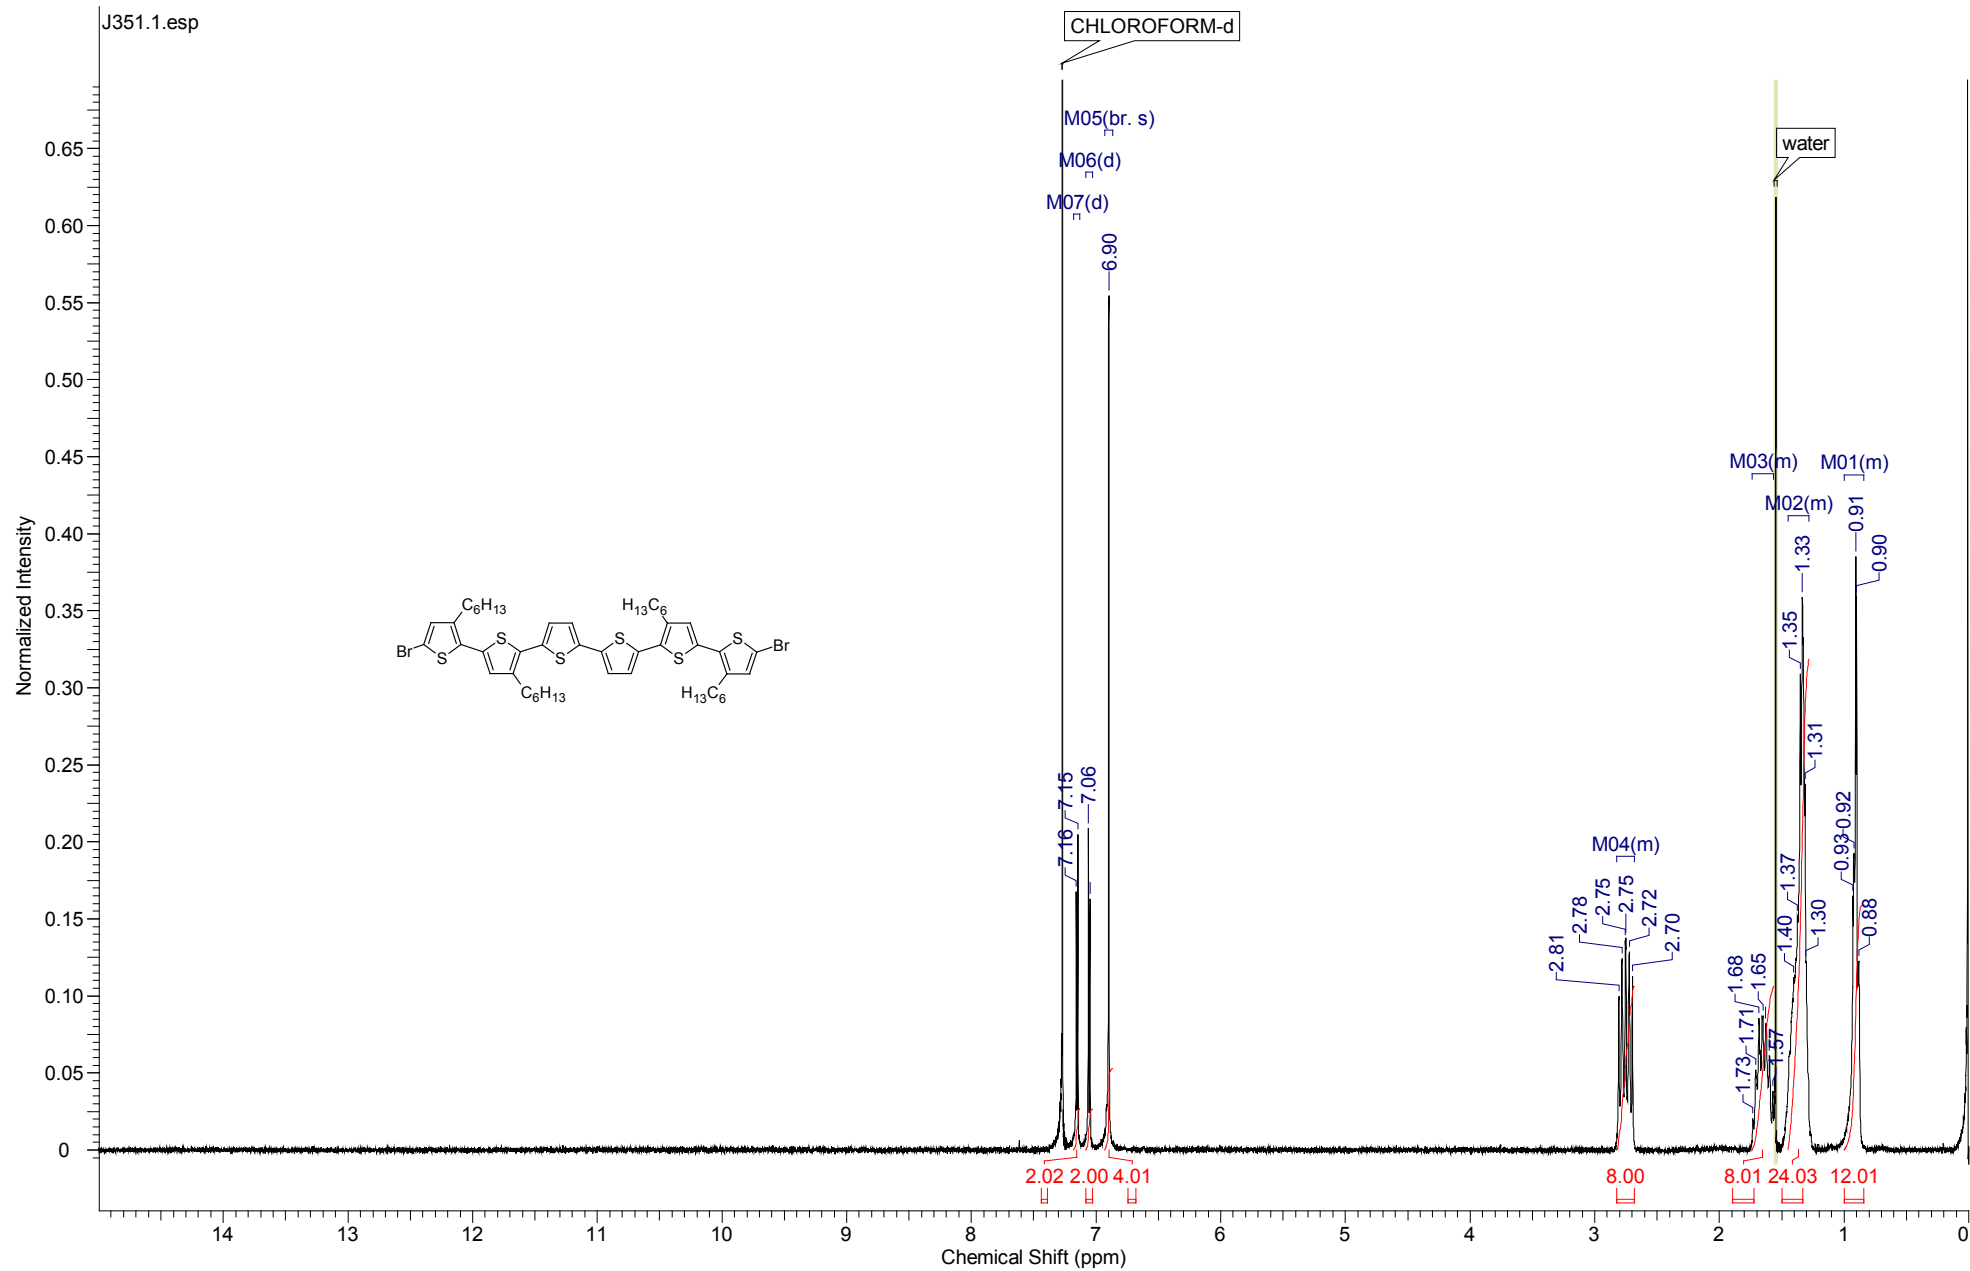

| No. | Shift1 (ppm) | H's | Type  | J (Hz) | Multiplet1 | Connections | (ppm)          |
|-----|--------------|-----|-------|--------|------------|-------------|----------------|
| 1   | 0.91         | 12  | m     | -      | M01        | -           | [0.84 .. 1.00] |
| 2   | 1.35         | 24  | m     | -      | M02        | -           | [1.28 .. 1.45] |
| 3   | 1.65         | 8   | m     | -      | M03        | -           | [1.57 .. 1.74] |
| 4   | 2.75         | 8   | m     | -      | M04        | -           | [2.68 .. 2.82] |
| 5   | 6.90         | 4   | br. s | -      | M05        | -           | [6.87 .. 6.93] |
| 6   | 7.05         | 2   | d     | 3.74   | M06        | M07         | [7.03 .. 7.08] |
| 7   | 7.15         | 2   | d     | 3.74   | M07        | M06         | [7.13 .. 7.18] |

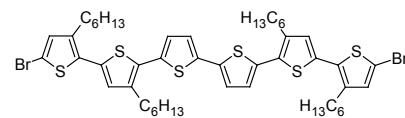



# <sup>1</sup>H NMR spectrum of 5,5'-(3,3''',3''''',4'-tetrahexyl-2,2':5',2'':5'',2''':5''',2''''':5''''',2''''''-sexithiene-5,5''''''-diyl)bis[8-(benzyloxy)quinoline] (5)

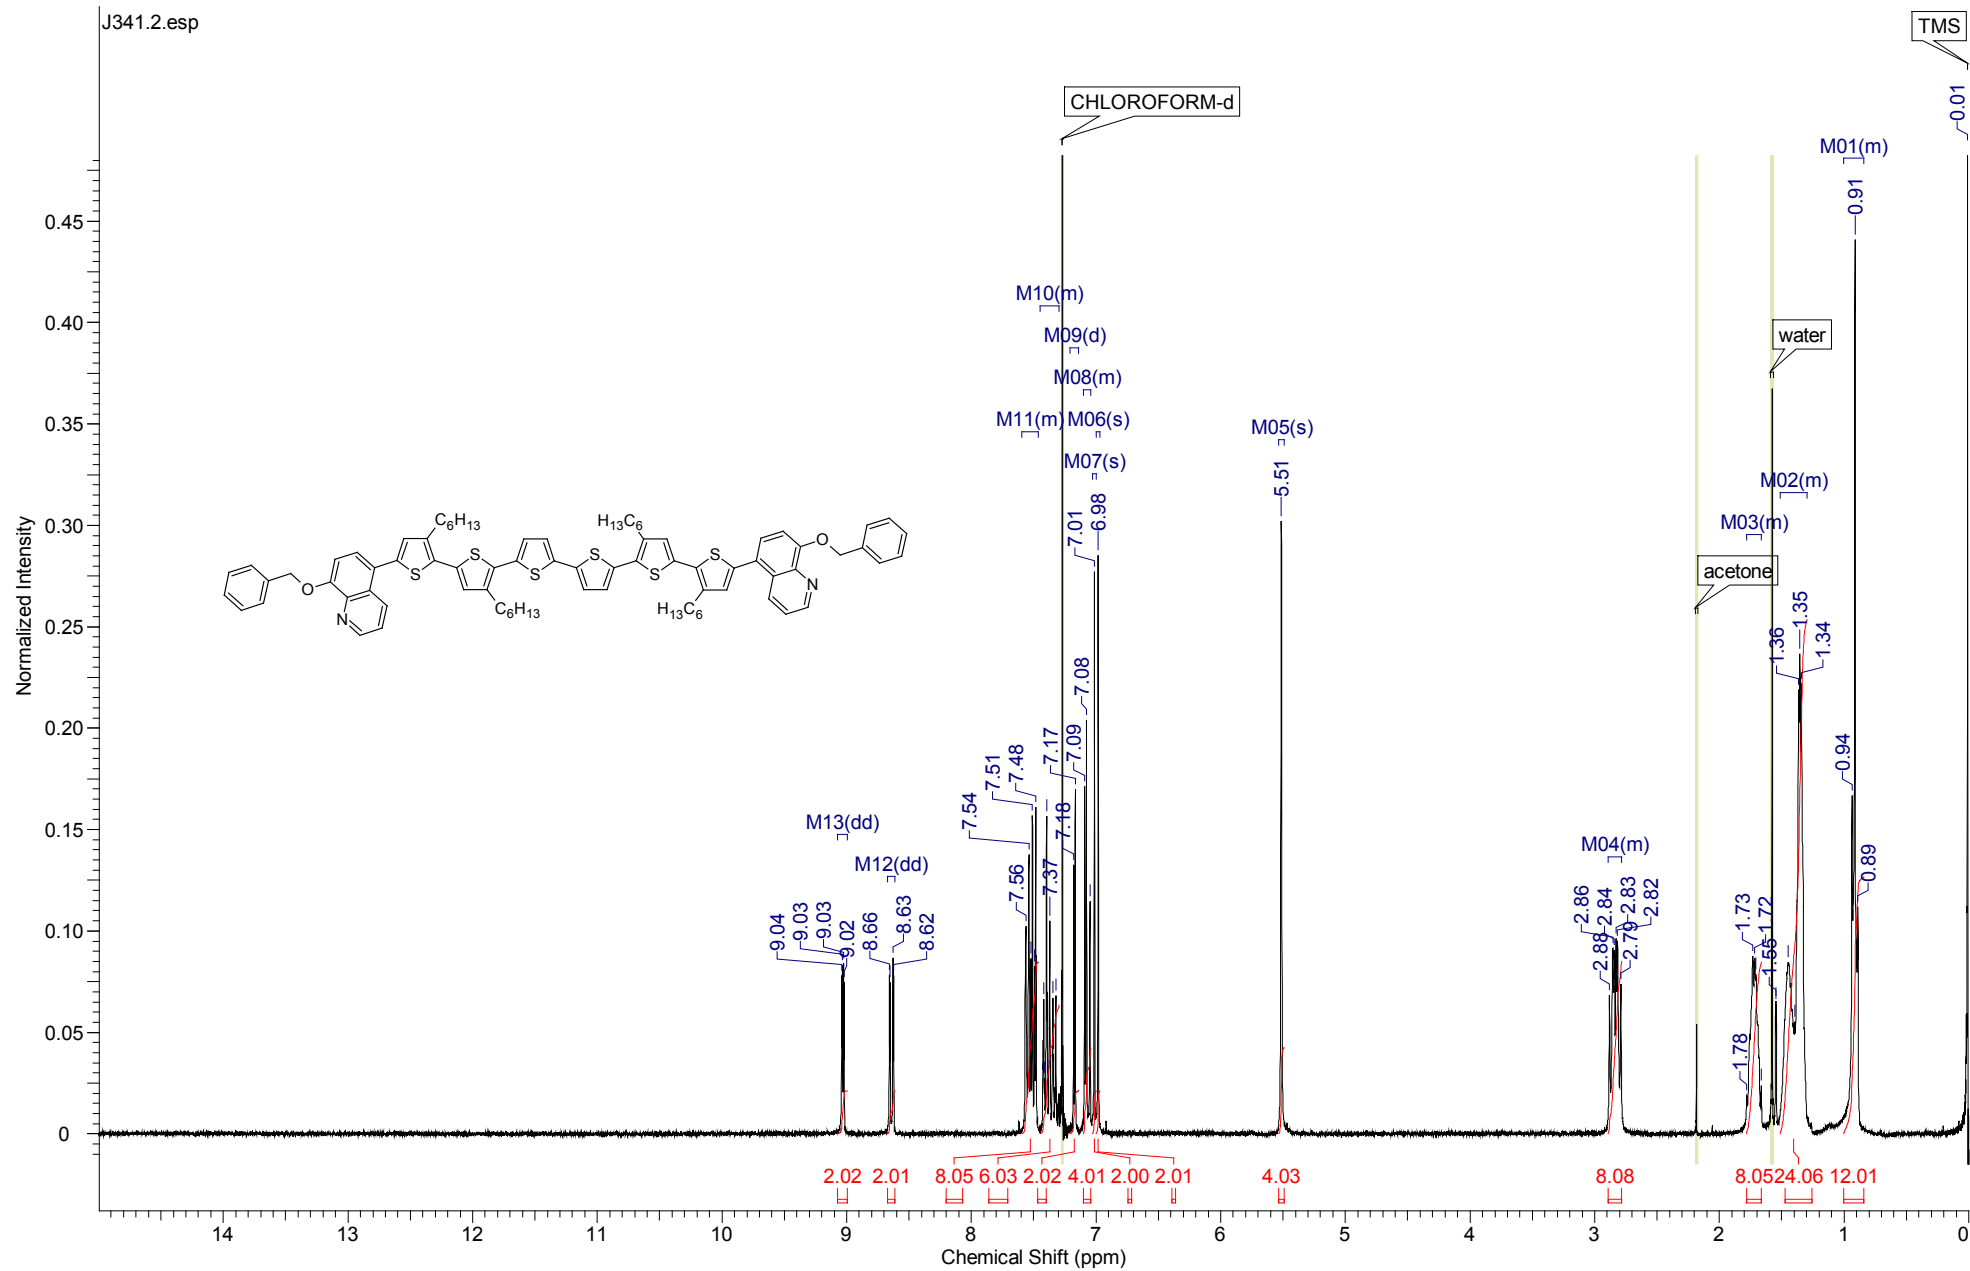

| No. | Shift1 (ppm) | H's | Type | J (Hz)     | Multiplet1 | Connections | (ppm)          |
|-----|--------------|-----|------|------------|------------|-------------|----------------|
| 1   | 0.91         | 12  | m    | -          | M01        | -           | [0.84 .. 1.01] |
| 2   | 1.38         | 24  | m    | -          | M02        | -           | [1.29 .. 1.51] |
| 3   | 1.72         | 8   | m    | -          | M03        | -           | [1.66 .. 1.78] |
| 4   | 2.84         | 8   | m    | -          | M04        | -           | [2.78 .. 2.89] |
| 5   | 5.51         | 4   | s    | -          | M05        | -           | [5.49 .. 5.54] |
| 6   | 6.98         | 2   | s    | -          | M06        | -           | [6.97 .. 7.00] |
| 7   | 7.01         | 2   | s    | -          | M07        | -           | [7.00 .. 7.03] |
| 8   | 7.07         | 4   | m    | -          | M08        | -           | [7.04 .. 7.10] |
| 9   | 7.17         | 2   | d    | 3.74       | M09        | M13         | [7.14 .. 7.21] |
| 10  | 7.38         | 6   | m    | -          | M10        | -           | [7.29 .. 7.45] |
| 11  | 7.52         | 8   | m    | -          | M11        | -           | [7.46 .. 7.60] |
| 12  | 8.64         | 2   | dd   | 8.56, 1.71 | M12        | ?, M13      | [8.61 .. 8.67] |
| 13  | 9.03         | 2   | dd   | 4.20, 1.71 | M13        | M09, M12    | [8.99 .. 9.07] |

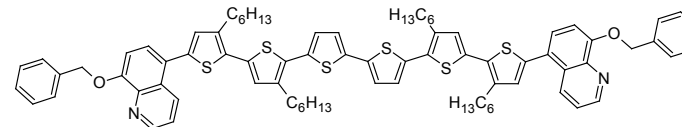

$^{13}\text{C}$  NMR spectrum of 5,5'-(3,3''',3''''',4'-tetrahexyl-2,2':5',2'':5'',2''':5''',2''''':5''''',2''''''-sexithiène-5,5''''''-diyl)bis[8-(benzyloxy)quinoline] (5)

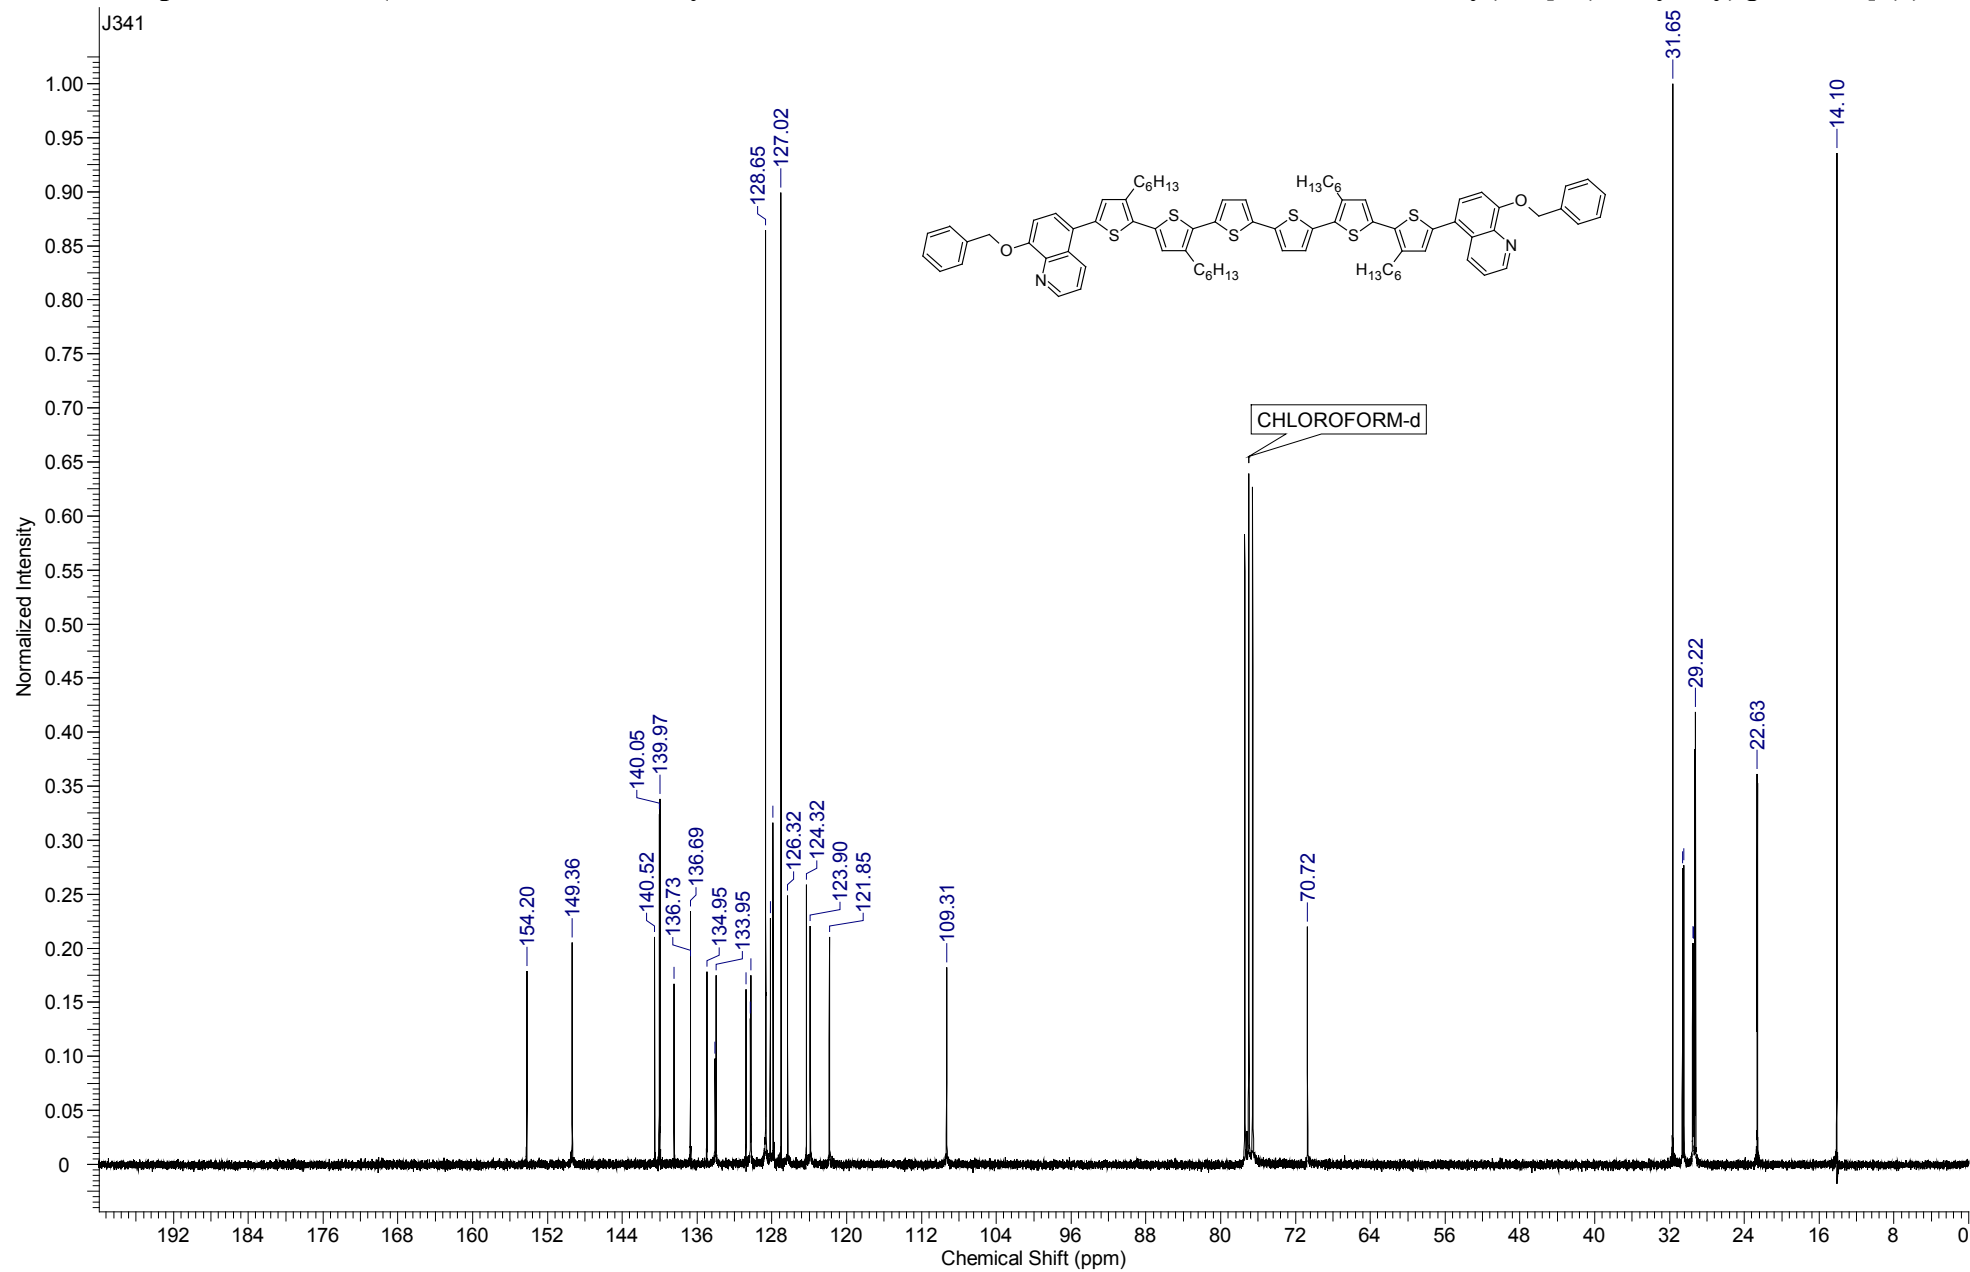

| No. | (ppm) | (Hz)   | Height | No. | (ppm)  | (Hz)   | Height | No. | (ppm)  | (Hz)   | Height | No. | (ppm)  | (Hz)    | Height | No. | (ppm)  | (Hz)    | Height |
|-----|-------|--------|--------|-----|--------|--------|--------|-----|--------|--------|--------|-----|--------|---------|--------|-----|--------|---------|--------|
| 1   | 14.10 | 1063.5 | 0.9356 | 9   | 30.62  | 2309.7 | 0.2738 | 17  | 127.02 | 9580.5 | 0.8994 | 25  | 130.77 | 9863.1  | 0.1619 | 33  | 140.05 | 10563.5 | 0.3239 |
| 2   | 22.60 | 1704.9 | 0.3526 | 10  | 31.65  | 2387.1 | 1.0000 | 18  | 127.83 | 9641.9 | 0.2145 | 26  | 133.95 | 10103.0 | 0.1752 | 34  | 140.52 | 10598.9 | 0.2106 |
| 3   | 22.63 | 1707.1 | 0.3611 | 11  | 70.72  | 5333.9 | 0.2202 | 19  | 127.86 | 9644.1 | 0.3161 | 27  | 134.07 | 10112.4 | 0.0981 | 35  | 149.36 | 11265.1 | 0.2055 |
| 4   | 29.22 | 2203.6 | 0.4188 | 12  | 109.31 | 8244.8 | 0.1821 | 20  | 128.18 | 9667.9 | 0.2280 | 28  | 134.95 | 10178.7 | 0.1786 | 36  | 154.20 | 11630.6 | 0.1788 |
| 5   | 29.27 | 2207.4 | 0.3843 | 13  | 121.85 | 9190.8 | 0.2106 | 21  | 128.63 | 9702.2 | 0.1611 | 29  | 136.69 | 10309.8 | 0.2343 |     |        |         |        |
| 6   | 29.43 | 2219.6 | 0.2040 | 14  | 123.90 | 9345.0 | 0.2203 | 22  | 128.65 | 9703.8 | 0.8644 | 30  | 136.73 | 10312.5 | 0.1880 |     |        |         |        |
| 7   | 29.52 | 2226.8 | 0.2049 | 15  | 124.32 | 9376.5 | 0.2591 | 23  | 130.23 | 9822.7 | 0.1747 | 31  | 138.45 | 10442.5 | 0.1671 |     |        |         |        |
| 8   | 30.47 | 2298.1 | 0.2766 | 16  | 126.32 | 9527.5 | 0.2485 | 24  | 130.29 | 9827.1 | 0.1351 | 32  | 139.97 | 10557.5 | 0.3379 |     |        |         |        |

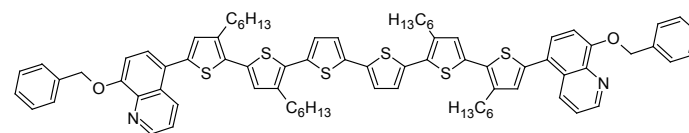

# <sup>1</sup>H NMR spectrum of 5,5'-(3,3''',3''''',4'-tetrahexyl-2,2':5',2'':5'',2''':5''',2''''':5''''',2''''''-sexithiene-5,5''''-diyl)diquinolin-8-ol (6)

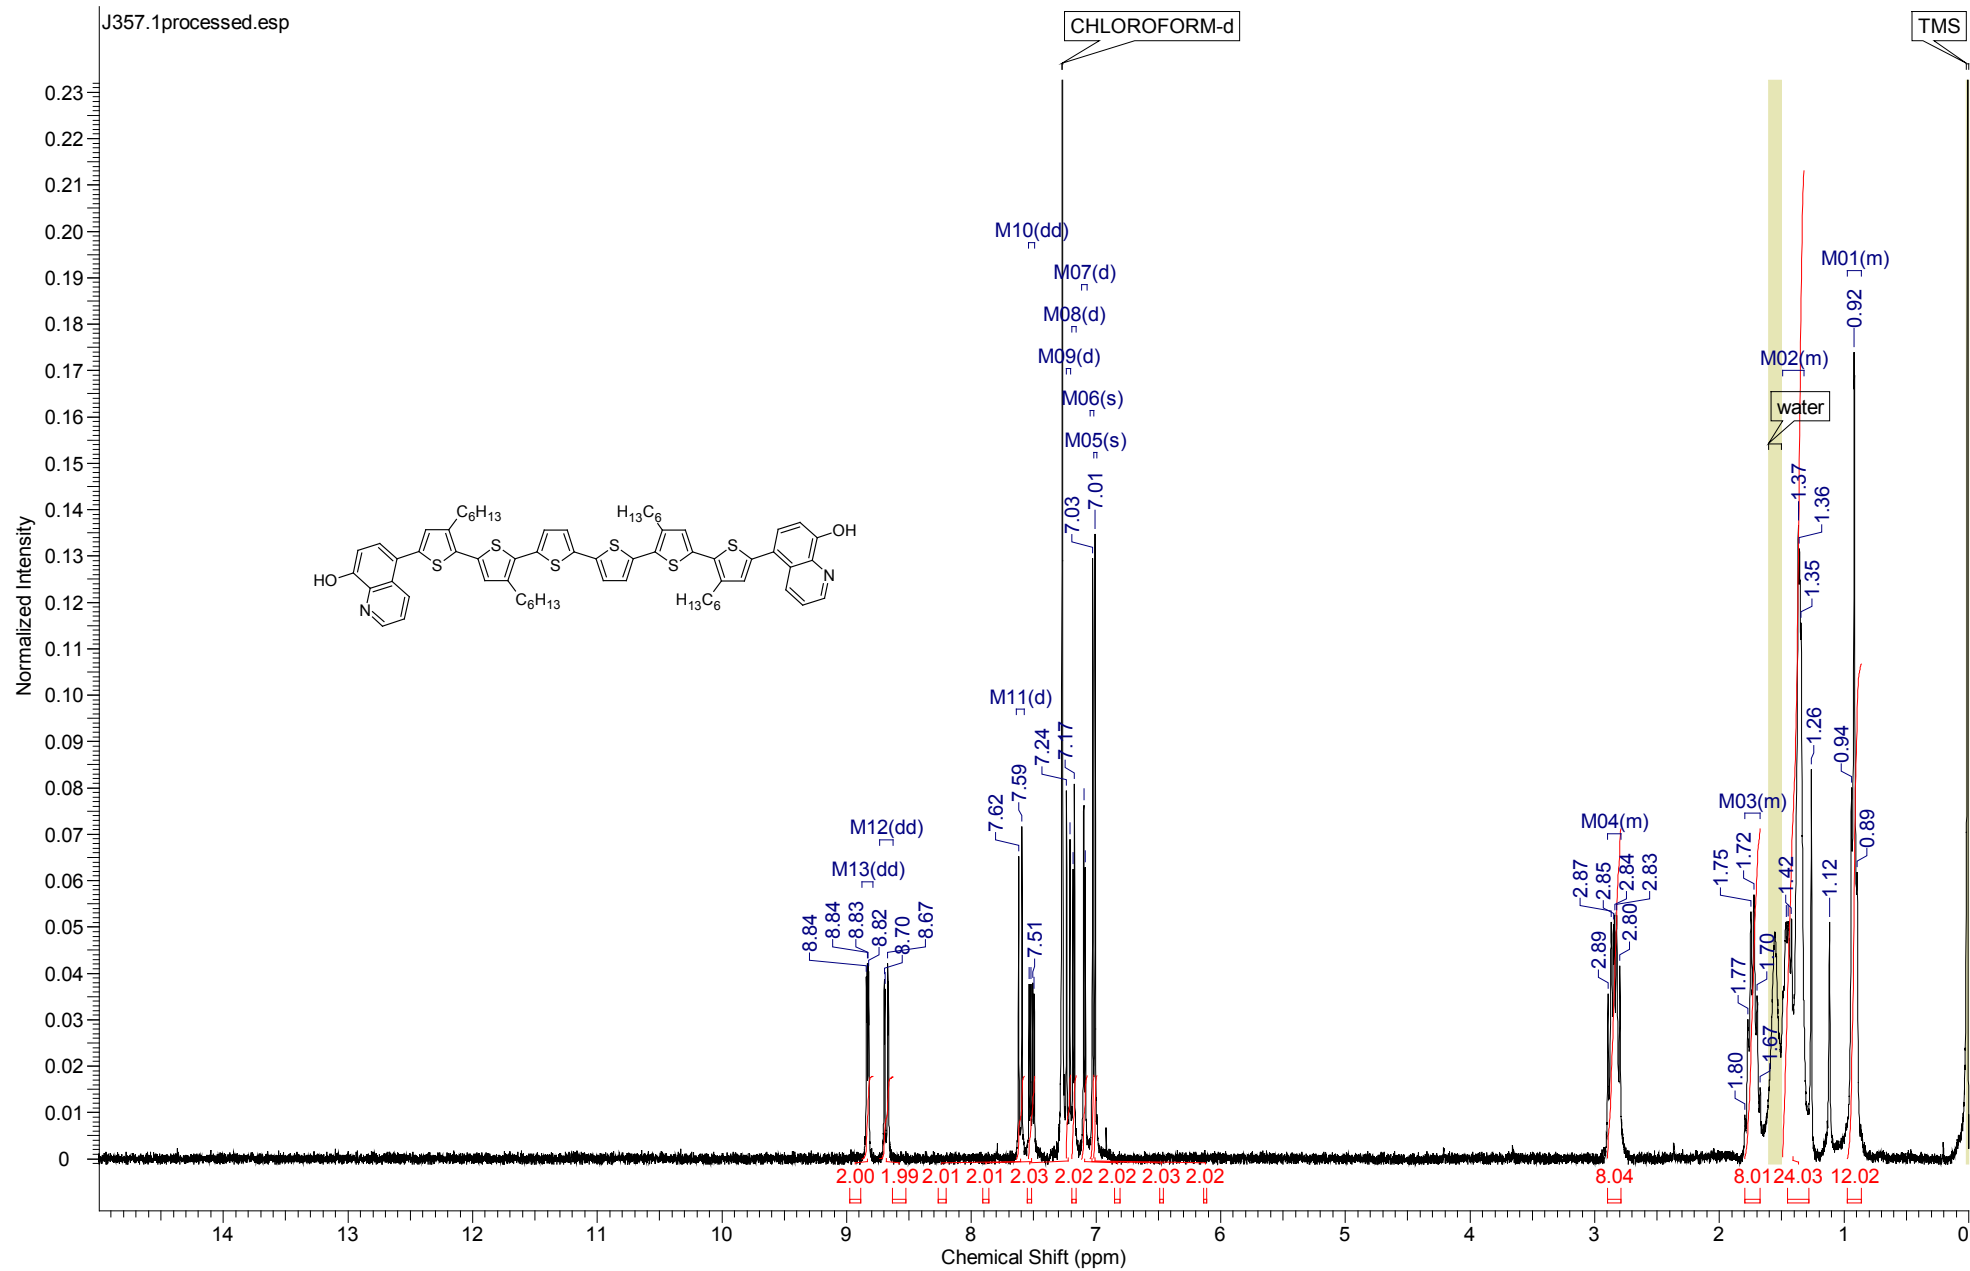

| No. | Shift1 (ppm) | H's | Type | J (Hz) | Multiplet1 | Connections | (ppm)          |
|-----|--------------|-----|------|--------|------------|-------------|----------------|
| 1   | 0.92         | 12  | m    | -      | M01        | -           | [0.86 .. 0.97] |
| 2   | 1.40         | 24  | m    | -      | M02        | -           | [1.32 .. 1.49] |
| 3   | 1.73         | 8   | m    | -      | M03        | -           | [1.67 .. 1.80] |
| 4   | 2.85         | 8   | m    | -      | M04        | -           | [2.79 .. 2.90] |
| 5   | 7.01         | 2   | s    | -      | M05        | -           | [7.00 .. 7.02] |
| 6   | 7.03         | 2   | s    | -      | M06        | -           | [7.02 .. 7.05] |
| 7   | 7.09         | 2   | d    | 3.74   | M07        | M08         | [7.07 .. 7.11] |

| No. | Shift1 (ppm) | H's | Type | J (Hz)     | Multiplet1 | Connections | (ppm)          |
|-----|--------------|-----|------|------------|------------|-------------|----------------|
| 8   | 7.18         | 2   | d    | 3.74       | M08        | M07         | [7.16 .. 7.20] |
| 9   | 7.22         | 2   | d    | 7.90       | M09        | M11         | [7.21 .. 7.24] |
| 10  | 7.52         | 2   | dd   | 8.60, 4.20 | M10        | M12, M13    | [7.49 .. 7.54] |
| 11  | 7.61         | 2   | d    | 7.90       | M11        | M09         | [7.58 .. 7.64] |
| 12  | 8.68         | 2   | dd   | 8.60, 1.60 | M12        | M10, M13    | [8.63 .. 8.74] |
| 13  | 8.83         | 2   | dd   | 4.20, 1.60 | M13        | M10, M12    | [8.79 .. 8.88] |

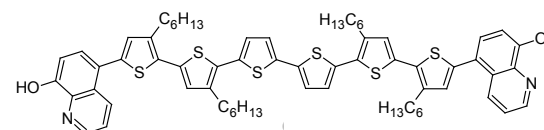

### $^{13}\text{C}$ NMR spectrum of 5,5'-(3,3''',3''''',4'-tetrahexyl-2,2':5',2'':5'',2''':5''',2''''':5''''',2''''''-sexithiене-5,5''''''-diyl)diquinolin-8-ol (6)

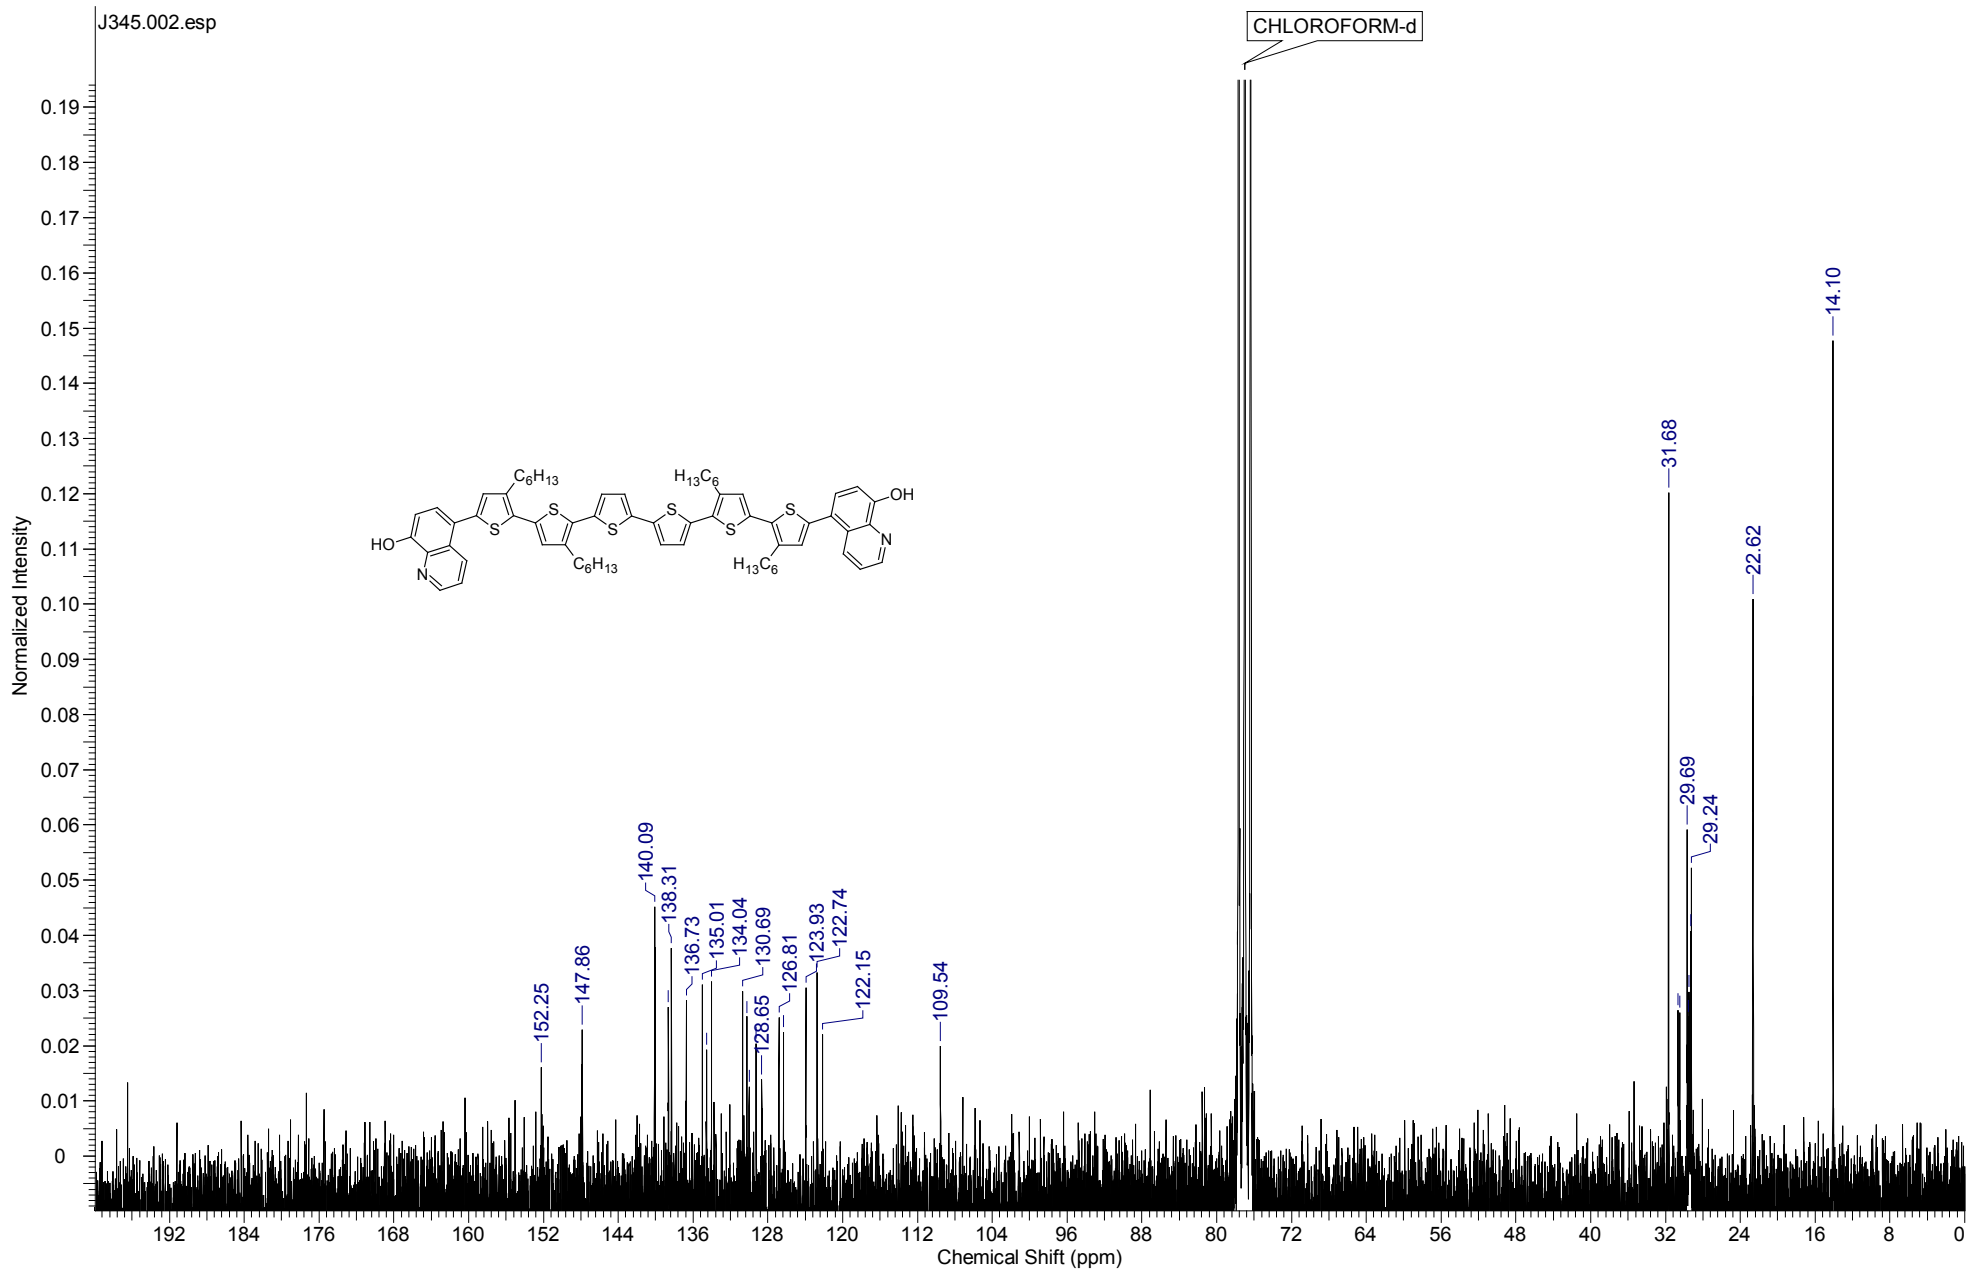

| No. | (ppm) | (Hz)   | Height | No. | (ppm)  | (Hz)   | Height | No. | (ppm)  | (Hz)   | Height | No. | (ppm)  | (Hz)   | Height |
|-----|-------|--------|--------|-----|--------|--------|--------|-----|--------|--------|--------|-----|--------|--------|--------|
| 1   | 14.10 | 709.8  | 0.1478 | 8   | 29.69  | 1494.0 | 0.0592 | 15  | 123.93 | 6236.3 | 0.0306 | 22  | 130.69 | 6576.7 | 0.0299 |
| 2   | 22.62 | 1138.5 | 0.1010 | 9   | 30.49  | 1534.3 | 0.0260 | 16  | 126.34 | 6357.7 | 0.0225 | 23  | 134.04 | 6745.0 | 0.0316 |
| 3   | 22.65 | 1139.6 | 0.0832 | 10  | 30.66  | 1543.1 | 0.0265 | 17  | 126.81 | 6381.5 | 0.0251 | 24  | 134.55 | 6770.7 | 0.0193 |
| 4   | 29.24 | 1471.2 | 0.0522 | 11  | 31.68  | 1594.1 | 0.1202 | 18  | 128.65 | 6474.0 | 0.0139 | 25  | 135.01 | 6793.8 | 0.0311 |
| 5   | 29.31 | 1474.9 | 0.0408 | 12  | 109.54 | 5512.2 | 0.0199 | 19  | 129.26 | 6504.8 | 0.0204 | 26  | 136.73 | 6880.8 | 0.0282 |
| 6   | 29.46 | 1482.6 | 0.0297 | 13  | 122.15 | 6146.8 | 0.0221 | 20  | 130.00 | 6542.2 | 0.0125 | 27  | 138.31 | 6960.0 | 0.0376 |
| 7   | 29.56 | 1487.7 | 0.0253 | 14  | 122.74 | 6176.5 | 0.0332 | 21  | 130.23 | 6553.6 | 0.0250 | 28  | 138.64 | 6976.5 | 0.0270 |

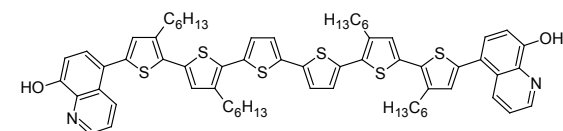



# $^1\text{H}$ NMR spectrum of $(\text{Alq}_3)_2\text{-OT}$

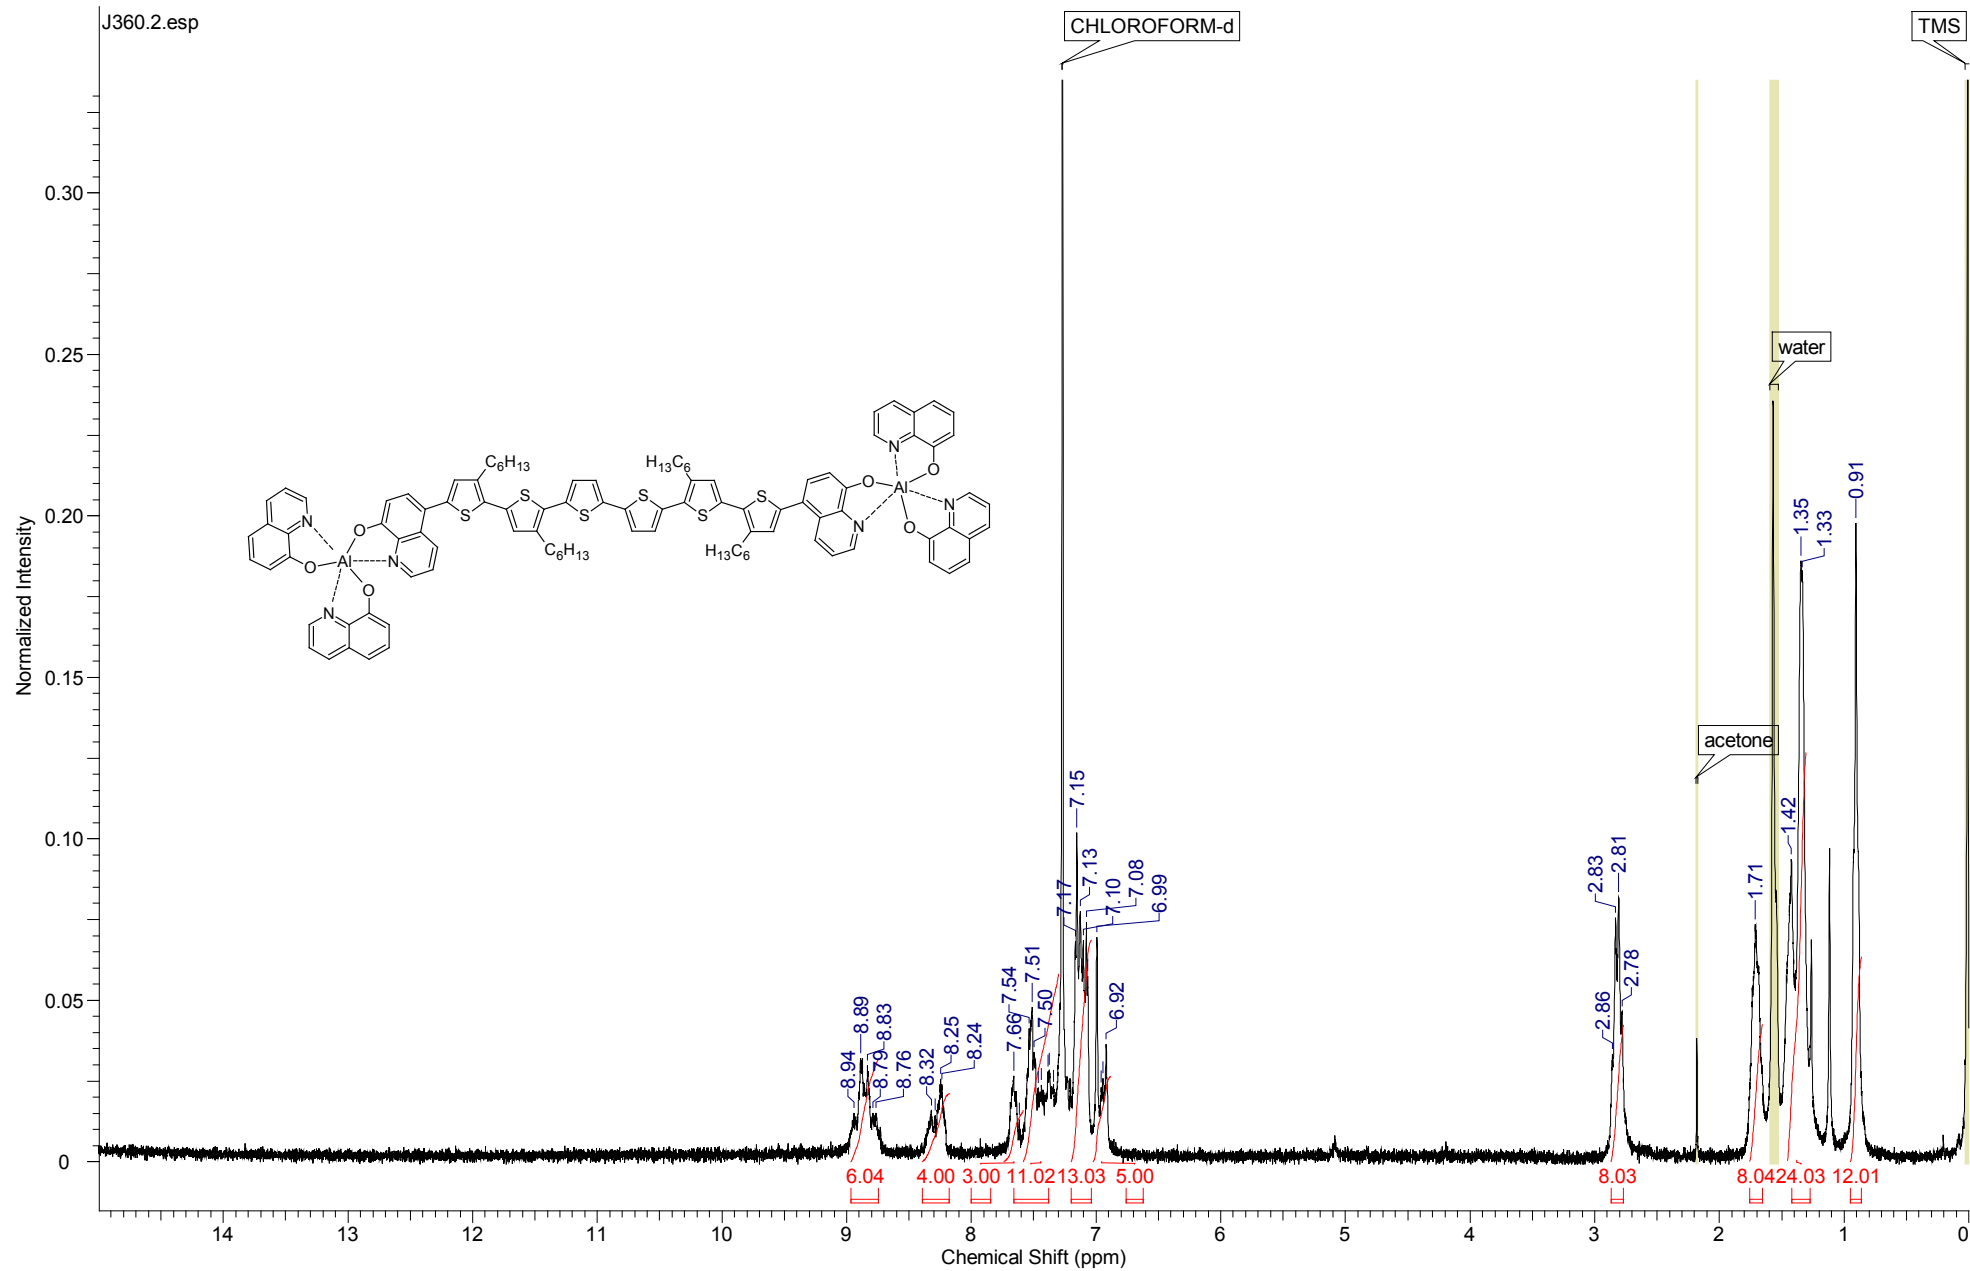

## Quenching of compound 5, Alq<sub>3</sub> and (Alq<sub>3</sub>)<sub>2</sub>-OT and in the presence of PCBM

Quenching via the dissociation of PCBM to compound 5. Alq<sub>3</sub> and (Alq<sub>3</sub>)<sub>2</sub>-OT would give values of quenching coefficients ( $k_q$ ) around  $10^{10} \text{ s}^{-1}$ . The values of  $k_q$  calculated from the intensities of Table 1 (from Figure 3) according to Stern Volmer equation ( $\frac{I_{PL}^0}{I_{PL}} = 1 + k_q \tau_0 [Q]$ ,  $I_{PL}^0$  = emission intensity without quencher,  $I_{PL}$  = emission intensity in the presence of quencher PCBM,  $\tau_0$  = lifetime without quencher,  $[Q]$  = concentration of the quencher) are larger than  $10^{11} \text{ s}^{-1}$  for all three compounds. This means that the quenching process does not involve the dissociation of the PCBM molecule. Thus, PCBM is associated with the compounds in the solutions.

### TCSPC decay curves of the (Alq<sub>3</sub>)<sub>2</sub>-OT and PCBM film samples and DAS spectra of (Alq<sub>3</sub>)<sub>2</sub>-OT and PCBM in CHCl<sub>3</sub>

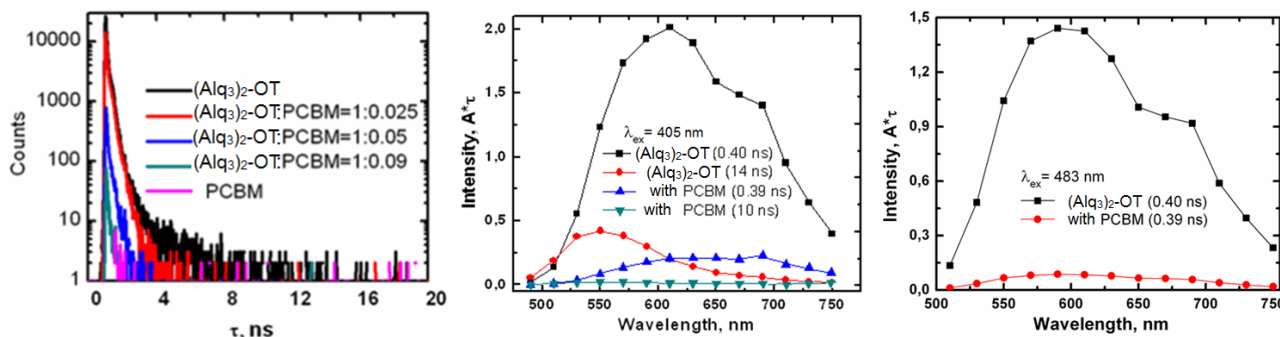

**Figure S1.** TCSPC decay curves of the studied (Alq<sub>3</sub>)<sub>2</sub>-OT and PCBM films (left), DAS of (Alq<sub>3</sub>)<sub>2</sub>-OT (0.22 mM) and mixture of (Alq<sub>3</sub>)<sub>2</sub>-OT (0.22 mM) and PCBM (0.84 mM) in CHCl<sub>3</sub> with excitation wavelengths 405 nm (center) and 483 nm (right).

### Table of the solar cell results with compound 5

**Table S1.** Photovoltaic parameters of the cells with compound 5 as an additional compound in the active layer.

| Cell structure<br>Mass ratio of the components                                                | $J_{sc, best}$<br>(mA/cm <sup>2</sup> ) | $V_{oc, best}$<br>(V) | FF <sub>best</sub><br>(%) | $\eta_{best}$<br>(%) | $\eta_{avg}$<br>(%) |
|-----------------------------------------------------------------------------------------------|-----------------------------------------|-----------------------|---------------------------|----------------------|---------------------|
| ITO ZnO PHT:PCBM Alq <sub>3</sub>  Au<br>9.0 mg : 7.1 mg (DCB)                                | -3.40                                   | 0.53                  | 60.26                     | <b>2.94</b>          | 2.58                |
| ITO ZnO PHT:PCBM:5 Alq <sub>3</sub>  Au<br>8.8 mg : 7.2 mg : 1.8 mg (DCB)                     | -3.19                                   | 0.50                  | 59.82                     | <b>2.57</b>          | 2.18                |
| ITO ZnO PHT:PCBM:5 Alq <sub>3</sub>  Au<br>8.8 mg : 7.2 mg : 1.8 mg (DCB, CHCl <sub>3</sub> ) | -3.79                                   | 0.50                  | 55.11                     | <b>2.82</b>          | 2.44                |
| ITO ZnO PHT:PCBM:5 Alq <sub>3</sub>  Au<br>9.1 mg : 7.0 mg : 2.7 mg (DCB)                     | -3.01                                   | 0.51                  | 56.31                     | <b>2.34</b>          | 2.13                |

### Absorption and emission spectra of the evaporated films of $(Alq_3)_2$ -OT

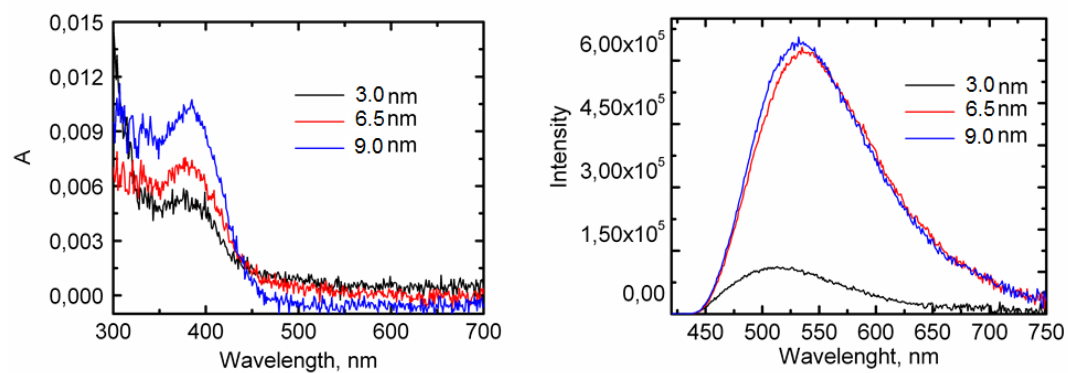

**Figure S2.** Absorption and emission spectra of the thermally evaporated (185 – 285 °C) 3 nm, 6.5 nm and 9.0 nm films of  $(Alq_3)_2$ -OT.

### DSC curve of $(Alq_3)_2$ -OT

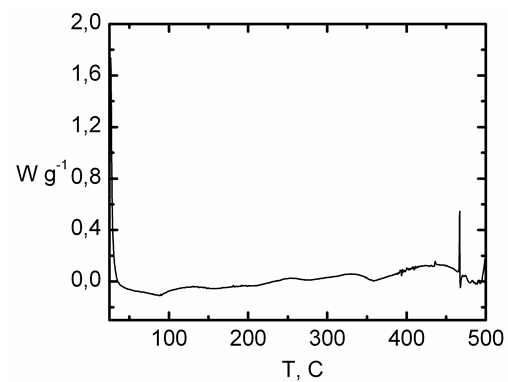

**Figure S3.** Differential scanning calorimetry curve of the  $(Alq_3)_2$ -OT. Thermal decomposition takes place around 400 °C.

### Transient absorption and decay component spectra of the $(\text{Alq}_3)_2\text{-OT}$ in the absence and presence of PCBM

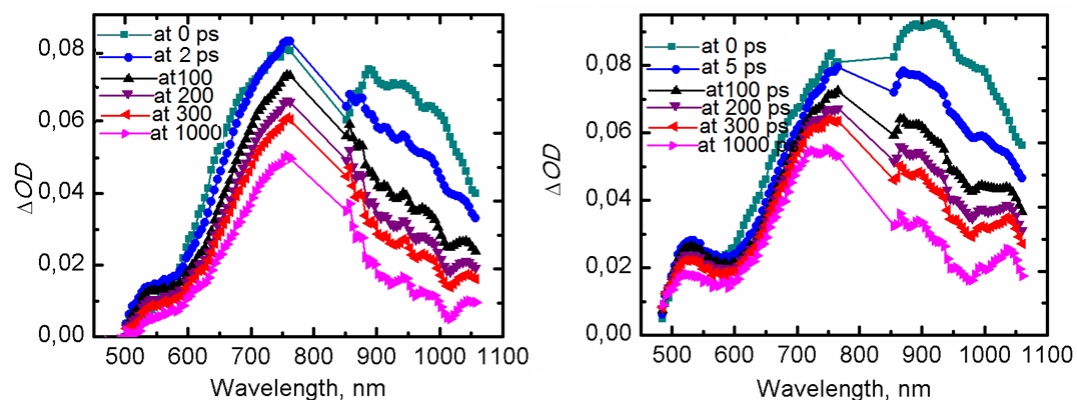

**Figure S4.** Transient absorption spectra of the  $(\text{Alq}_3)_2\text{-OT}$  (0.22 mM) in the absence (left) and in the presence (right) of PCBM (0.84 mM) at 0 ps, 5 ps, 100 ps, 200 ps, 300 ps and 1000 ps after photoexcitation at 390 nm in  $\text{CHCl}_3$ .

### Excitation spectra of compound **5** and $(\text{Alq}_3)_2\text{-OT}$

The excitation spectra of compound **5** and  $(\text{Alq}_3)_2\text{-OT}$  in Figure S5 show that the excitation spectrum maxima of  $(\text{Alq}_3)_2\text{-OT}$  and compound **5** are at 401 nm and 417 nm, respectively. Absorption spectra of the compounds overlap, but the excitation spectrum maximum of  $(\text{Alq}_3)_2\text{-OT}$  is blue shifted compared to that of compound **5**. Emission of the oligothiophene moiety is partly quenched due to the intramolecular electron transfer from the oligothiophene backbone to the  $\text{Alq}_3$  moieties in  $(\text{Alq}_3)_2\text{-OT}$  and the emission maximum of  $(\text{Alq}_3)_2\text{-OT}$  shifts towards  $\text{Alq}_3$  emission maximum.

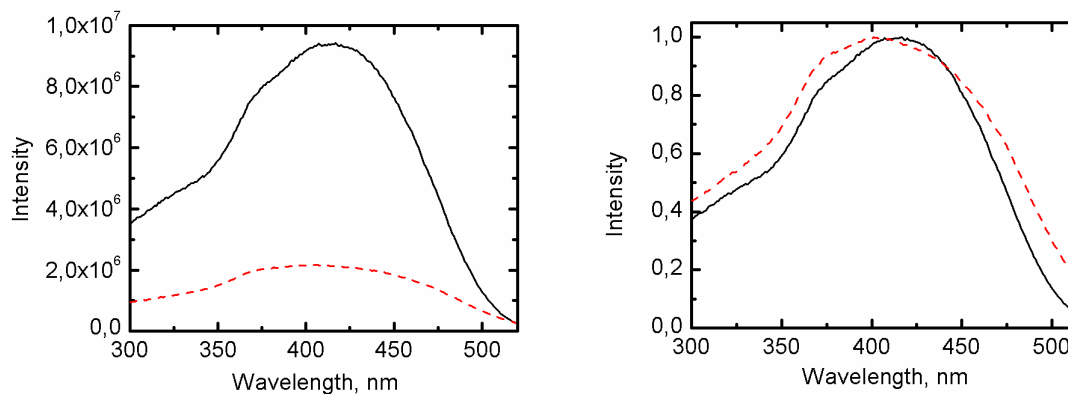

**Figure S5.** Excitation (left) and normalized excitation spectra (right) of 0.22 mM  $(\text{Alq}_3)_2\text{-OT}$  (dashed line) and compound **5** (solid line) in  $\text{CHCl}_3$  monitoring at 550 nm and exciting from 300 nm to 520 nm.

## DPV curves of compound **5** and (Alq<sub>3</sub>)<sub>2</sub>-OT and calculations of the HOMO and LUMO levels

### Energy levels of (Alq<sub>3</sub>)<sub>2</sub>-OT

The peak potential of (Alq<sub>3</sub>)<sub>2</sub>-OT in the backward (negative) scan is -2.103 V for calculating the LUMO level (Figure S6, left, red line). The corresponding reduction peak in the forward (positive) scan can be seen as a vague shoulder. The oxidation peak potential of the forward scan is 0.608 V and the corresponding peak value of the backward scan is 0.610 V. Therefore, the half wave potential ( $V_{1/2}$ ) for calculating the HOMO level is 0.609 V ( $[(0.608 \text{ V} + 0.610 \text{ V}) / 2]$ ). Ferrocene reference peak potentials appear at 0.230 V and 0.205 V in the forward and backward scans, respectively (Figure S6, left, black line).  $V_{1/2}$  of ferrocene used for the energy level calculations is 0.2175 V ( $[(0.230 \text{ V} + 0.205 \text{ V}) / 2]$ ).

HOMO and LUMO level calculations were based on the formal oxidation and reduction potentials observed in the DPV curves according to the following equations:

$$E_{\text{HOMO}} = -(4.8 + E_{\text{dif,ox}}) \text{ eV} = -(4.8 + [0.609 - 0.2175]) \text{ eV} = -5.1915 \text{ eV} \approx -5.2 \text{ eV}$$

$$E_{\text{LUMO}} = (-E_{\text{dif,red}} + 4.8) \text{ eV} = (-[-2.103 + 0.2175] + 4.8) \text{ eV} = -2.4795 \text{ eV} \approx -2.5 \text{ eV}$$

where 4.8 eV is the oxidation energy of ferrocene.  $E_{\text{dif,ox}}$  is the difference in volts between the formal oxidation potentials of ferrocene and the measured sample.  $E_{\text{dif,red}}$  is the difference in volts between the formal oxidation potential of ferrocene and the formal reduction potential of the sample.

### Energy levels of compound **5**

The peak potential of compound **5** reduction in the forward scan can be seen as a shoulder at -2.25 V and the corresponding shoulder value of the backward scan is -2.30 V (Figure S6, right, red curve).  $V_{1/2}$  of compound **5** for calculating the LUMO level is -2.275 V ( $[-2.25 \text{ V} + -2.30] / 2$ ). The peak around -1.5 V in the backward scan is due to some impurity. The oxidation peak potential of the forward scan is 0.58 V and the corresponding peak value of the backward scan is 0.62 V.  $V_{1/2}$  of compound **5** for calculating the HOMO level is 0.60 V ( $[(0.58 \text{ V} + 0.62 \text{ V}) / 2]$ ). Ferrocene reference peak potentials appear at 0.250 V and 0.240 V in the forward and backward scans, respectively (Figure S6, right, black line).  $V_{1/2}$  of ferrocene used for the energy level calculations is 0.245 V ( $[(0.250 \text{ V} + 0.240 \text{ V}) / 2]$ ).

HOMO and LUMO level calculations were based on the formal oxidation and reduction potentials observed in the DPV curves according to the following equations:

$$E_{\text{HOMO}} = -(4.8 + E_{\text{dif,ox}}) \text{ eV} = -(4.8 + [0.60 - 0.245]) \text{ eV} = -5.155 \text{ eV} \approx -5.2 \text{ eV}$$

$$E_{\text{LUMO}} = (-E_{\text{dif,red}} + 4.8) \text{ eV} = (-[-2.275 + 0.245] + 4.8) \text{ eV} = -2.28 \text{ eV} \approx -2.3 \text{ eV}$$

where 4.8 eV is the oxidation energy of ferrocene.  $E_{\text{dif,ox}}$  is the difference in volts between the formal oxidation potentials of ferrocene and the measured sample.  $E_{\text{dif,red}}$  is the difference in volts between the formal oxidation potential of ferrocene and the formal reduction potential of the sample.

In the absence of clear reduction peak of compound **5** (only shoulders appear), LUMO level for the compound is calculated based on the optical band gap. Absorption maximum of the compound appears at 423 nm and the optical band gap is 2.9334 eV.  $\text{LUMO} = \text{HOMO} - 2.9334 \text{ eV} = -5.155 \text{ eV} - (2.9334 \text{ eV}) = -2.2216 \text{ eV} \approx 2.2 \text{ eV}$ .

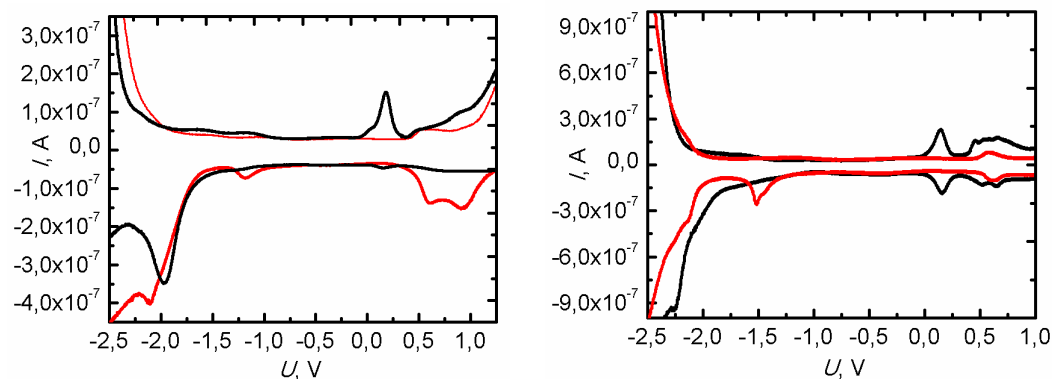

**Figure S6.** DPV curve of (Alq<sub>3</sub>)<sub>2</sub>-OT (left) and compound **5** (right) in the absence (red) and presence (black) of ferrocene reference.
